# Supplementary material for: Core genes can have higher recombination rates than accessory genes within global microbial populations
Source: eLife journal article supplement (doi:10.7554/elife.78533), 2022-07-08
Supplement: figures [file elife-78533-figures-v2.pdf]

---

## Figures and figure supplements

Core genes can have higher recombination rates than accessory genes within global microbial populations

**Asher Preska Steinberg et al**

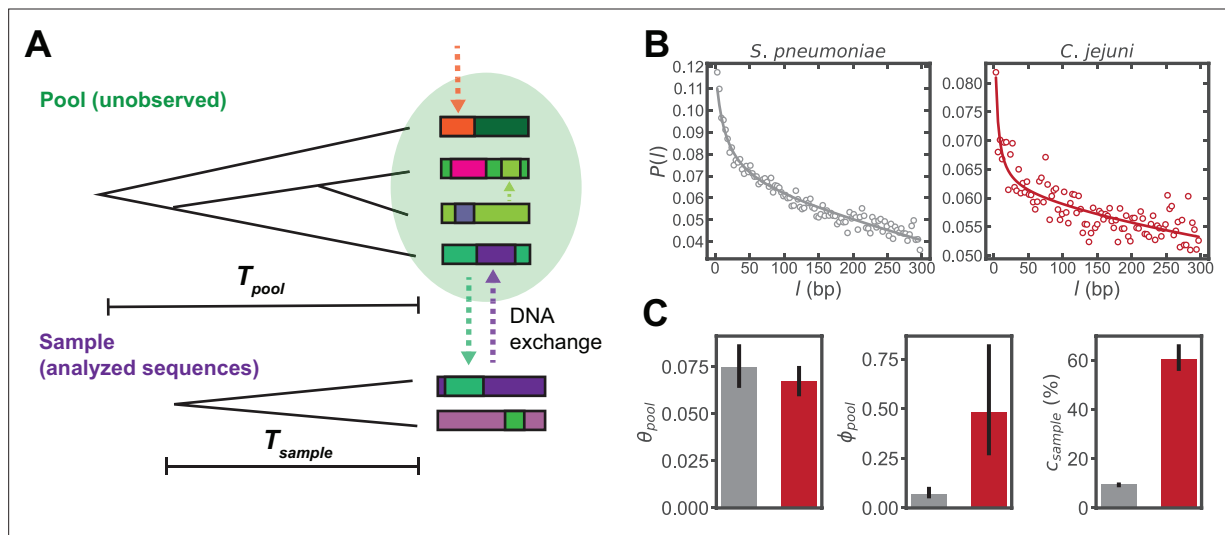

**Figure 1.** Inferring parameters of homologous recombination from whole genome sequences (WGS). **(A)** Schematic depicting exchange of homologous DNA fragments between the analyzed sequences ('Sample') and a larger, unobserved reservoir of bacterial genomes ('Pool'). The coalescence times of the pool and sample are denoted as  $T_{pool}$  and  $T_{sample}$ , respectively. **(B)** Example correlation profiles of synonymous substitutions for the core genes in samples consisting of 568 *S. pneumoniae* and 2215 *C. jejuni* WGS (further description of these datasets are given in the following sections). **(C)** Recombination parameters inferred from fitting the profiles shown in panel C to a population genetics model (see Materials and methods). Left to right: the pool's mutational divergence ( $\theta_{pool}$ ), the pool's recombinational divergence ( $\phi_{pool}$ ), and the sample's recombination coverage ( $c_{sample}$ ). Error bars are 95% bootstrap confidence intervals (see Materials and methods). Colors correspond to panel B.  $\theta_{pool}$  and  $\phi_{pool}$  have units of  $\text{bp}^{-1}$  and  $c_{sample}$  is given as the percentage of genomic sites that have recombined.

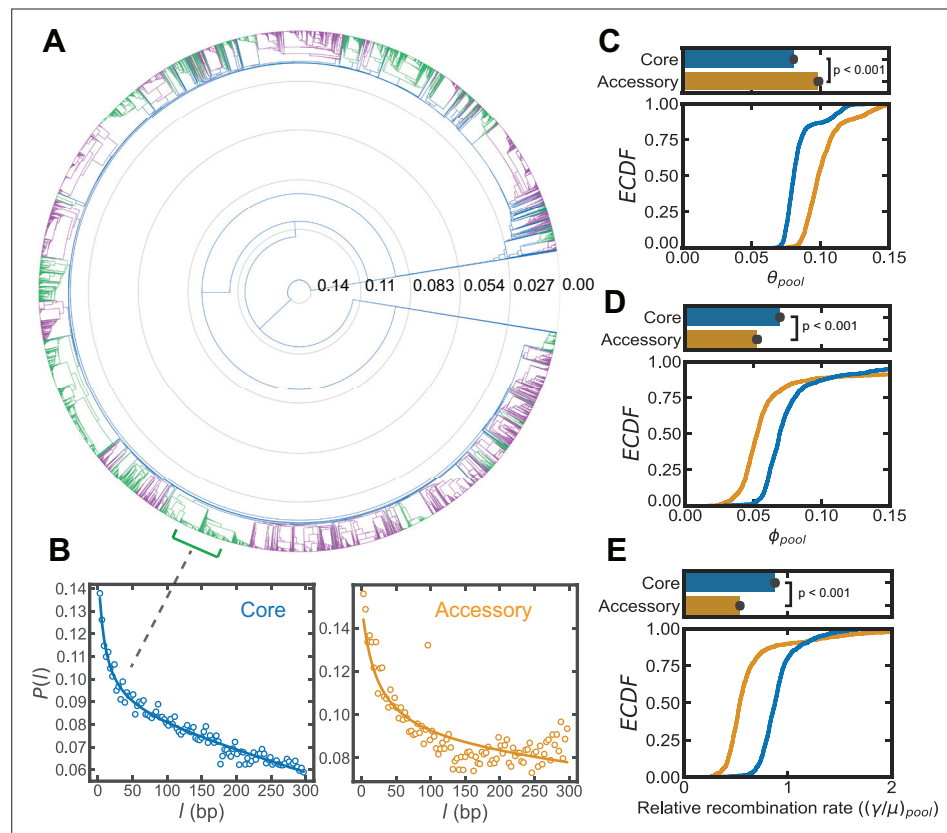

**Figure 2.** Inference of recombination parameters for the core and accessory genome of *S. pneumoniae*. (A) Dendrogram resulting from hierarchical clustering of 26,599 whole genome sequences (WGS) from the PubMLST genome collection for *S. pneumoniae* using the average linkage algorithm. The dendrogram was cut at the 10th percentile of all measured pairwise distances ( $d_s \sim 0.015$ ) yielding a discrete set of flat clusters. Here, we analyzed the 44 major clusters (those with >100 sequences) which resulted from this cut, encompassing 24,097 strains. In the dendrogram, alternating colors delineate adjacent clusters. (B) Correlation profiles measured across the core and accessory genes of a *S. pneumoniae* sequence cluster. Open-faced circle is the profile measured from sequencing data and solid line is the fit to the population genetics model. (C–E) Distributions of the pool's mutational and recombinational divergence ( $\theta_{pool}$  and  $\phi_{pool}$ , shown in panels C and D, respectively) and the relative recombination rate of the pool ( $(\gamma/\mu)_{pool}$ , shown in panel E). For C–E, the bottom plot depicts empirical cumulative distribution functions (ECDFs) for each parameter and the top plots depict the medians of the bottom plot, where error bars are 95% bootstrap CIs created by sampling the distributions with replacement ( $n = 1000$ ). Each step in the ECDF corresponds to a pool recombination parameter inferred from a correlation profile measured over a sequence cluster or pair of clusters like that shown in panel B. Core genes are defined as genes found in >95% of strains. We used model selection with the Akaike information criterion to ensure that each profile was well fit (see Materials and methods for details).  $\theta_{pool}$  and  $\phi_{pool}$  have units of  $\text{bp}^{-1}$  and  $(\gamma/\mu)_{pool}$  is unitless. Two-sided p-values were calculated using the Wilcoxon signed-rank test and were  $p = 1.9\text{e-}159$ ,  $3.9\text{e-}53$ , and  $3.5\text{e-}99$  for panels C–E, respectively.

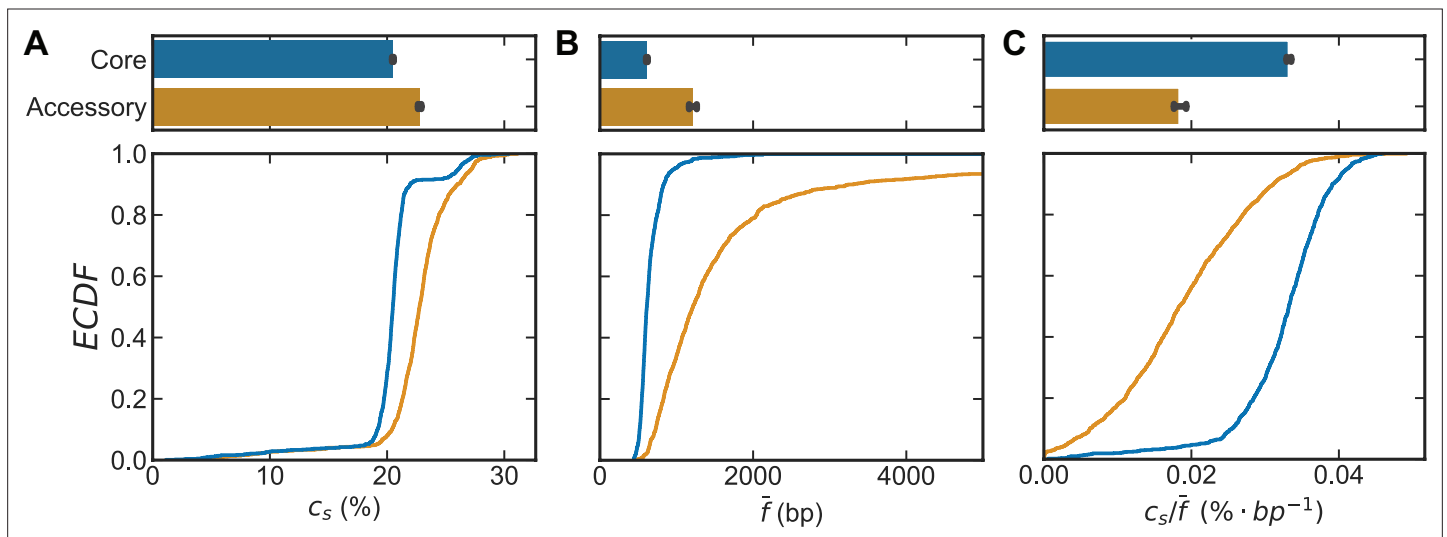

**Figure 2—figure supplement 1.** Recombination coverage and average size of a recombined fragment for *S. pneumoniae*. Distributions of (A) the recombination coverage ( $c_s$ ), (B) the mean size of a fragment recombined into the genome ( $\bar{f}$ ), and (C) the recombination coverage normalized by the mean fragment size ( $c_s/\bar{f}$ ) for all *S. pneumoniae* clusters and cluster pairs depicted in **Figure 2**. The recombination rates are inferred for the pools, while the coverage and fragments sizes are inferred for the samples (i.e., the analyzed sequence clusters). For A–C, the bottom plot depicts empirical cumulative distribution functions (ECDFs) for each parameter and the top plots depict the medians of the bottom plot, where error bars are 95% bootstrap CIs created by sampling the distributions with replacement ( $n = 1000$ ). The recombination coverage is given as the percentage of genomic sites recombined, all other units are given in axis labels.

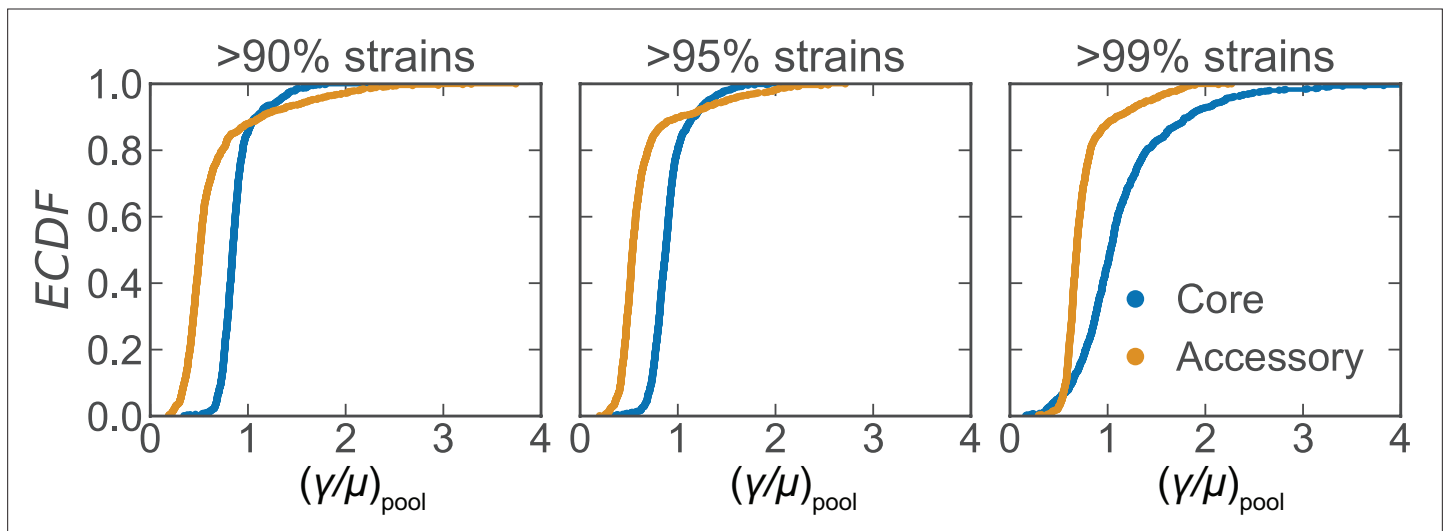

**Figure 2—figure supplement 2.** Recombination rate distributions for *S. pneumoniae* using different core gene cutoff thresholds. Distributions of the relative recombination rate of the pool  $((\gamma/\mu)_{\text{pool}})$  for the core and accessory genomes of *S. pneumoniae* using different thresholds (indicated in subpanels) to define core genes (same dataset as **Figure 2**). Each subplot depicts empirical cumulative distribution functions (ECDFs) where each step in the ECDF corresponds to a pool recombination parameter inferred from a correlation profile measured over a sequence cluster or pair of clusters like that which is shown in **Figure 2B**. We used model selection with the Akaike information criterion to ensure that each profile was well fit (see Materials and methods for details).  $(\gamma/\mu)_{\text{pool}}$  is unitless.

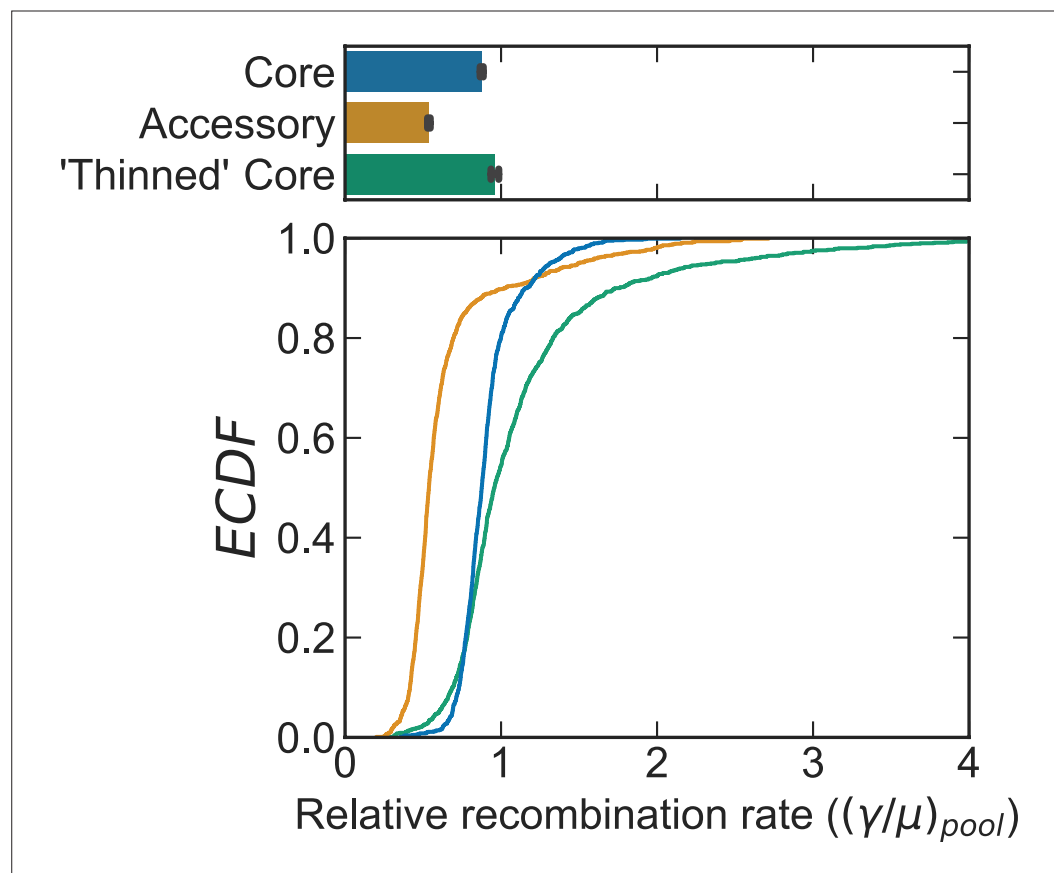

**Figure 2—figure supplement 3.** Comparison of recombination rates for the actual core and accessory genome versus an artificially 'thinned' core genome for *S. pneumoniae*. Distributions of the relative recombination rate of the pool  $((\gamma/\mu)_{pool})$  for the *S. pneumoniae* dataset shown in **Figure 2**. The bottom plot depicts empirical cumulative distribution functions (ECDFs) and the top plots depict the medians of the bottom plot, where error bars are 95% bootstrap CIs created by sampling the distributions with replacement ( $n = 1000$ ). Each step in the ECDF corresponds to a pool recombination parameter inferred from a correlation profile measured over a sequence cluster or pair of clusters like that which is shown in **Figure 2B**. Core genes are defined as genes found in >95% of strains. Curves/bars labeled 'Core' and 'Accessory' are reproduced from **Figure 2E**. Curve/bar labeled 'Thinned' Core is recombination rates inferred for the core genome which has been artificially 'thinned' to have the same number of sequence pairs as the accessory genome, as described in the main text. We used model selection with the Akaike information criterion to ensure that each profile was well fit (see Materials and methods for details).

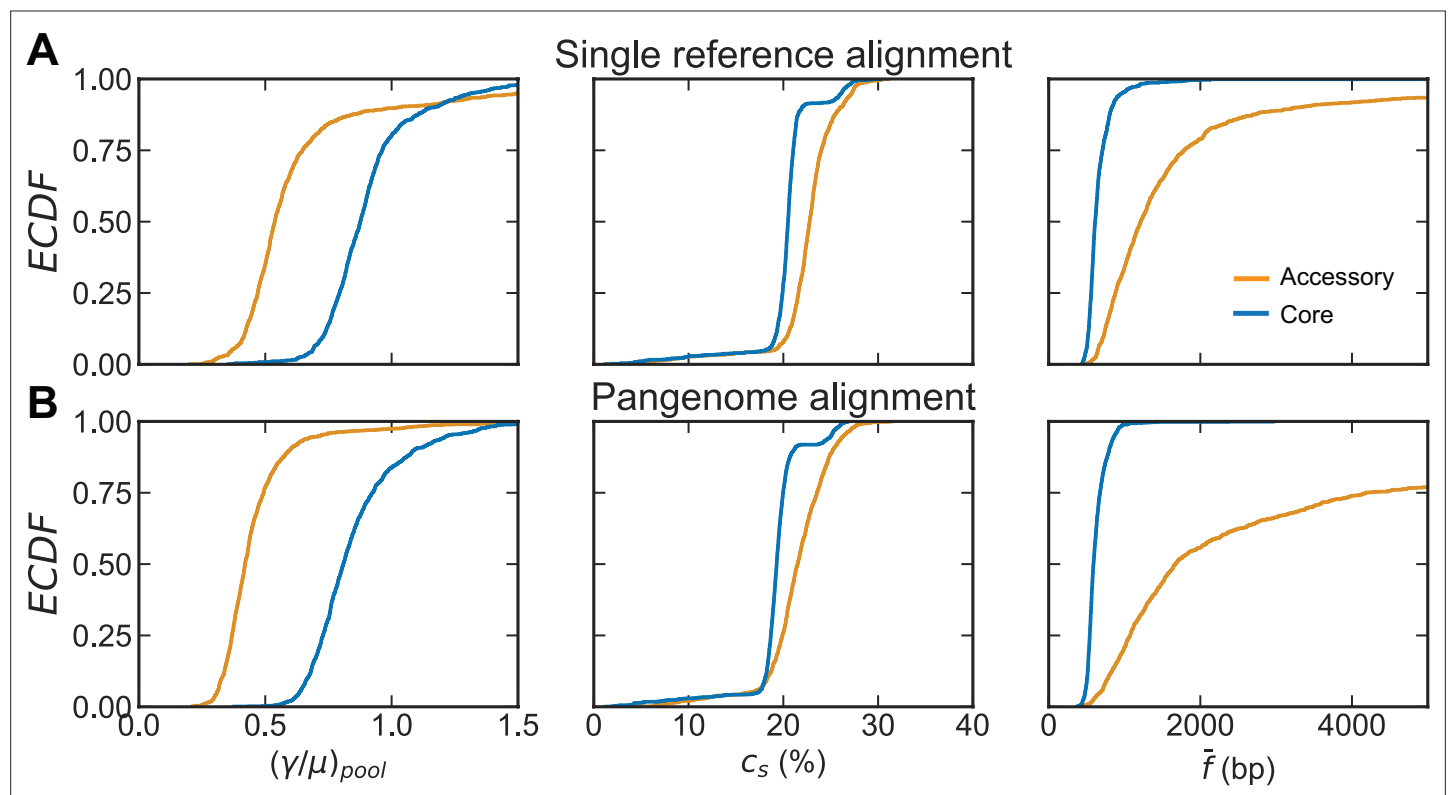

**Figure 2—figure supplement 4.** Comparison of distributions of recombination parameters for the core and accessory genome of *S. pneumoniae* with different alignment methods. Recombination parameters inferred for each of the major sequence clusters (>100 strains) of ~26,000 *S. pneumoniae* strains from the PubMLST collection when raw reads were aligned to a single reference genome (A) compared to when raw reads were aligned to a multi-FASTA of all gene sequences in a pangenome generated by Roary (Page et al., 2015) (B). From left to right: distributions of the relative recombination rate ( $(\gamma/\mu)_{pool}$ ), the recombination coverage ( $c_s$ ), and the mean size of a fragment recombined into the genome ( $\bar{f}$ ). The recombination rates are inferred for the pools, while the coverage and fragments sizes are inferred for the samples (i.e., the analyzed sequence clusters). Each plot depicts empirical cumulative distribution functions (ECDFs) for each parameter, where each step is a parameter inferred for a cluster or cluster pair. Core genes are defined as genes found in >95% of strains. For (A), left panel is reproduced from Figure 2E, center and right panels are reproduced from Figure 2—figure supplement 1. Clustering with the alignment using a single reference genome resulted in 44 major clusters, clustering with the pangenome alignment resulted in 46 major clusters. The relative recombination rate is unitless, recombination coverage is given as the percentage of genomic sites recombined, and the mean recombined fragment size is given in basepairs (bp).

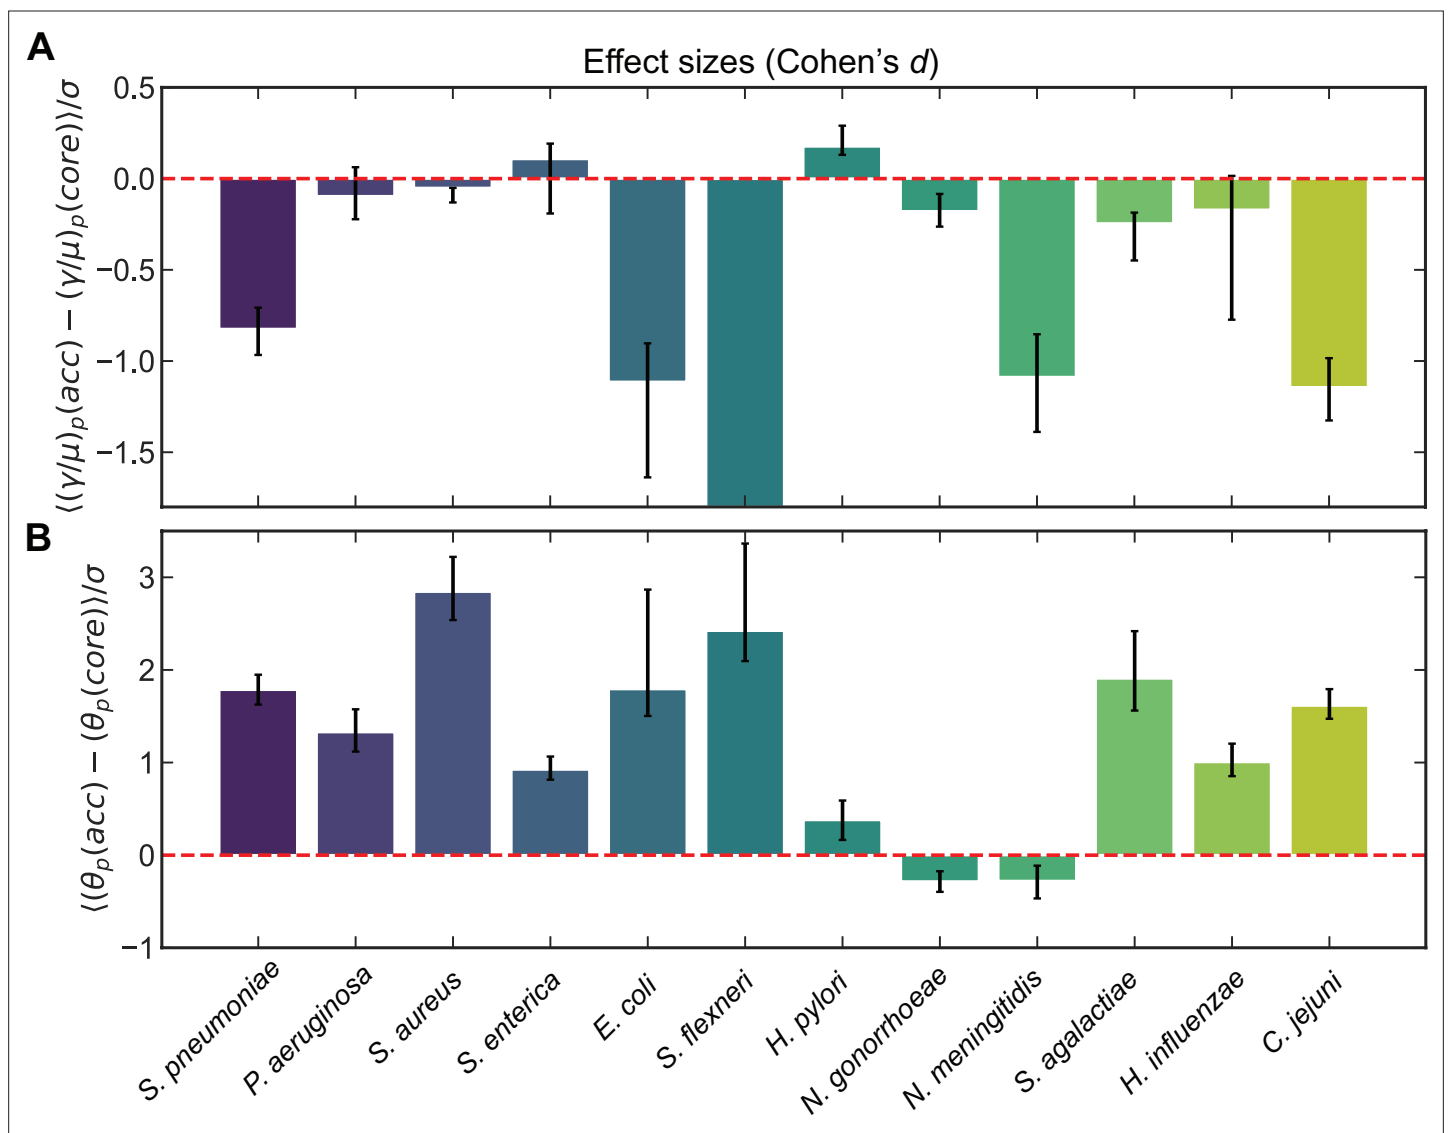

**Figure 3.** Effect sizes (Cohen's  $d$ ) for recombination rates and mutational divergence for *S. pneumoniae* and 11 additional microbial species. Effect sizes (Cohen's  $d$ ) for (A) the relative recombination rate of the pool  $((\gamma/\mu)_p)$  and (B) the mutational divergence of the pool  $(\theta_p)$  for core/accessory genome pairs for individual clusters and pairs of clusters for *S. pneumoniae* and 11 additional microbial species. Cohen's  $d$  for paired samples was calculated as the mean paired difference  $\langle X_p(acc) - X_p(core) \rangle$ , where  $X = (\gamma/\mu)_p$  or  $\theta_p$  divided by the standard deviation of paired difference ( $\sigma$ ). Error bars are 95% bootstrap CIs, calculated by sampling the distributions with replacement 10,000 times. All effect sizes are listed in **Supplementary files 1 and 2**, as well as the medians of the distributions and the results of the Wilcoxon signed-rank test for each species. For A, the effect size and 95% bootstrap CI for *S. flexneri* are  $-25.5$  and  $[-34.4, -21.1]$ , respectively. When model selection was performed with Akaike information criterion (AIC) (described in Materials and methods) if part of a core/accessory pair was poorly fit, the paired sample was excluded. Full species names, number of strains, number of clusters, and mean synonymous diversity within and between clusters are reported for each species in **Supplementary file 3**. Legends of supplementary material.



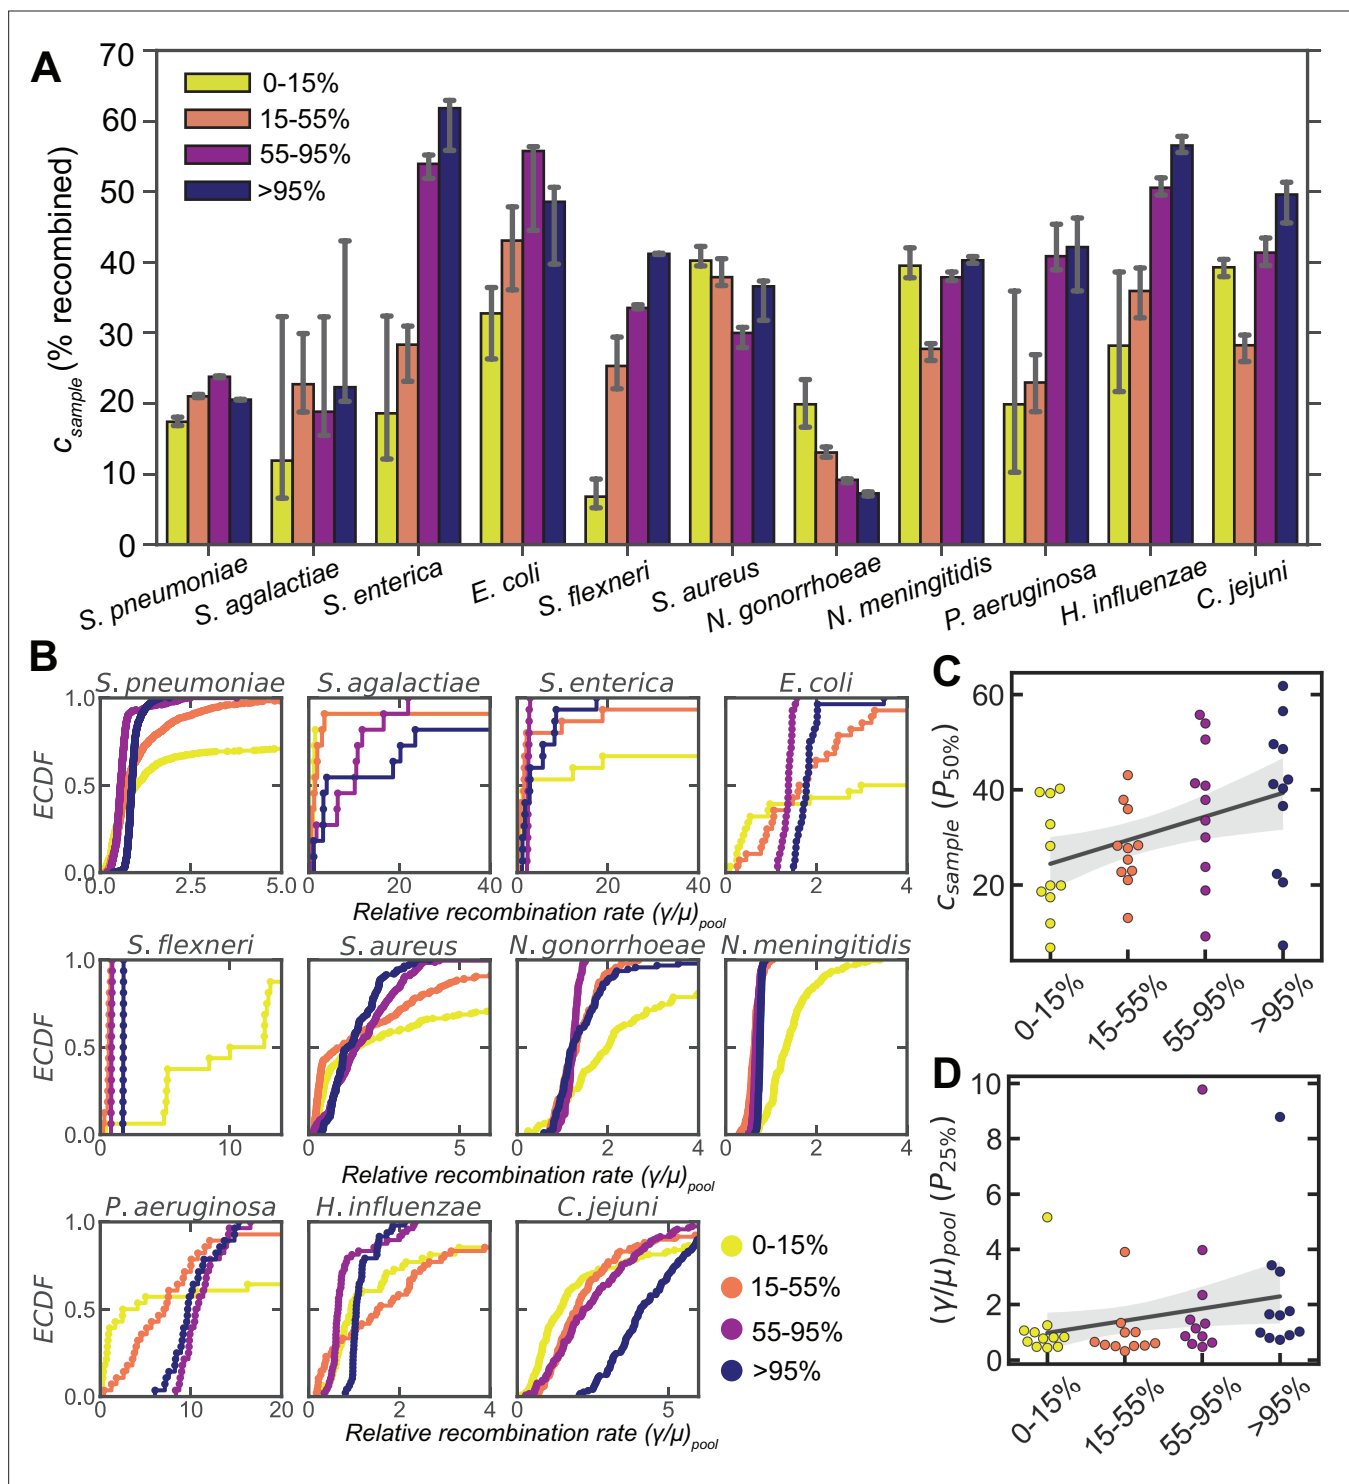

**Figure 3—figure supplement 1.** Dependence of recombination rates on gene frequency. **(A)** Bar plots depicting the medians of the recombination coverage ( $c_{\text{sample}}$ , given as the percentage of sites recombined) for genes of different frequency (i.e., the percentage of strains which have a given gene) for 11 microbial species. Matched parameter distributions were inferred from correlation profiles within and between clusters for each species. Error bars are 95% bootstrap CIs measured by randomly sampling with replacement from the parameter distributions. 10,000 bootstrap replicates were calculated. **(B)** ECDFs of the relative recombination rate ( $(\gamma/\mu)_{\text{pool}}$ ), for different gene frequencies corresponding to the same matched distributions shown in A. Two-sided p values were calculated using the Friedman test to compare the matched distributions shown in A and B (**Supplementary file 4**). The 50th percentile of the recombination coverage **(C)** and the 25th percentile of the rate **(D)** distributions for each species plotted against gene frequency. The solid gray line is a simple linear regression; shaded areas are 95% CIs of the regression estimated by bootstrapping the medians for each species.

Figure 3—figure supplement 1 continued on next page

*Figure 3—figure supplement 1 continued*

species. p values were calculated using the Wald test, where the null hypothesis is that the slope is less than zero;  $p = 0.003$  and  $0.05$  for panels C and D, respectively. For all panels, only matched samples where parameters could be inferred for each gene frequency bin were included (i.e., all correlation profiles were deemed well fit by model selection using Akaike information criterion [AIC] as described in Materials and methods). For *H. pylori* this excluded almost all matched samples ( $< 3$  remained), leaving us with insufficient data to perform this analysis.
