# Supplementary material for: Core genes can have higher recombination rates than accessory genes within global microbial populations
Source: eLife journal article supplement (doi:10.7554/elife.78533), 2022-07-08
Supplement: supp [file elife_poa_e78533_Supplementary_File_5.xlsx]

## Sheet: Sheet1
Type of data	Data source	Identifier(s)
PubMLST database for microbial species analyzed	PubMLST	https://pubmlst.org/
Reference genome for Streptococcus pneumoniae	NCBI RefSeq	RefSeq ID: NC_003098.1; https://www.ncbi.nlm.nih.gov/genome/176?genome_assembly_id=299864
Reference genome for Staphylococcus aureus	NCBI RefSeq	RefSeq ID: NC_007795.1; https://www.ncbi.nlm.nih.gov/genome/154?genome_assembly_id=299272
Reference genome for Streptococcus agalactiae	NCBI RefSeq	RefSeq ID: NZ_LR134512.1; https://www.ncbi.nlm.nih.gov/genome/?term=Streptococcus+agalactiae
Reference genome for Salmonella enterica subsp. Enterica	NCBI RefSeq	RefSeq ID: NC_003197.2; https://www.ncbi.nlm.nih.gov/genome/152?genome_assembly_id=305903
Reference genome for Escherichia coli	NCBI RefSeq	RefSeq ID: NC_000913.3; https://www.ncbi.nlm.nih.gov/genome/?term=escherichia+coli
Reference genome for Shigella flexneri	NCBI RefSeq	RefSeq ID: NC_004337.2; https://www.ncbi.nlm.nih.gov/genome/?term=shigella+flexneri%5Borgn%5D
Reference genome for Neisseria gonorrhoeae	NCBI RefSeq	RefSeq ID: NZ_CP012028.1; https://www.ncbi.nlm.nih.gov/genome/864?genome_assembly_id=233772
Reference genome for Neisseria meningitidis	NCBI RefSeq	RefSeq ID: NZ_CP021520.1; https://www.ncbi.nlm.nih.gov/genome/172
Reference genome for Pseudomonas aeruginosa	NCBI RefSeq	RefSeq ID: NC_002516.2; https://www.ncbi.nlm.nih.gov/genome/?term=txid287[orgn]
Reference genome for Haemophilus influenzae	NCBI RefSeq	RefSeq ID: NZ_CP009610.1; https://www.ncbi.nlm.nih.gov/genome/?term=haemophilus+influenzae%5Borgn%5D
Reference genome for Campylobacter jejuni	NCBI RefSeq	RefSeq ID: NC_002163.1; https://www.ncbi.nlm.nih.gov/genome/?term=Campylobacter+jejuni
XMFA for Helicobacter pylori	Ref 28 from main text; Dryad data repository	DOI: 10.5061/dryad.8qp4n
Raw reads corresponding to whole genome sequences for Escherichia coli and Shigella flexneri	NCBI, Bioproject: “Routine survelliance of E. coli and Shigella by Public Health England”	Bioproject ID: PRJNA315192; https://www.ncbi.nlm.nih.gov/bioproject/?term=PRJNA315192
Raw reads corresponding to whole genome sequences for Haemophilus influenzae	Ref (Potts et al., 2019); NCBI, Bioproject: “WGS Data for Haemophilus influenzae isolates”	Bioproject ID: PRJNA512636; https://www.ncbi.nlm.nih.gov/bioproject/?term=PRJNA512636
