# Supplementary material for: Core genes can have higher recombination rates than accessory genes within global microbial populations
Source: eLife. 2022 Jul 8;11:e78533. doi: 10.7554/eLife.78533 (PMC9444244; doi:10.7554/eLife.78533)
Supplement: Supplementary file 1. — Values listed in the table were computed for core/accessory genome pairs for individual clusters and pairs of clusters. Effect sizes for the relative recombination rate (γ/μpool) were calculated using Cohen’s d for paired samples using the mean paired difference (γ/μpacc-γ/μpcore) divided by the standard deviation of paired differences (σ). Two-sided p values were calculated using the Wilcoxon signed-rank test to compare the paired distributions of relative recombination rates for the core and accessory genome within each microbial species. The null hypothesis is that the distribution of paired differences is symmetric about zero (where Xiacc-Xicore is the paired difference for recombination parameter X inferred for the core and accessory genome of cluster or cluster pair i). The columns γ/μpoolacc and γ/μpoolcore correspond to the median relative recombination rate of the accessory and core genome over all clusters and pairs of clusters. Values displayed in brackets are 95% bootstrap CIs calculated by sampling the distributions with replacement 10,000 times. [file elife-78533-supp1.xlsx]

## Sheet: Sheet1
Species	Effect size for	p-value
S. pneumoniae	-0.824 [-0.966, -0.704]	3.49e-99	0.538 [0.529, 0.546]	0.876 [0.867, 0.886]
P. aeruginosa	-0.0961 [-0.224, 0.0595]	0.918	10.3 [9.72, 10.7]	10.0 [9.6, 10.8]
S. aureus	-0.0508 [-0.133, -0.0508]	0.0261	1.5 [1.43, 1.61]	1.63 [1.51, 1.74]
S. enterica	0.107 [-0.191, 0.192]	0.504	2.6 [2.5, 3.6]	4.97 [3.77, 5.77]
E. coli	-1.11 [-1.63, -0.903]	2.34e-16	1.36 [1.33, 1.43]	1.78 [1.76, 1.84]
S. flexneri	-25.5 [-34.4, -21.1]	8.3e-06	0.796 [0.787, 0.837]	1.77 [1.77, 1.79]
H. pylori	0.176 [0.13, 0.29]	2.84e-11	11.0 [7.48, 14.4]	4.32 [3.98, 4.77]
N. gonorrhoeae	-0.179 [-0.262, -0.0833]	0.698	1.24 [1.22, 1.25]	1.11 [1.06, 1.16]
N. meningitidis	-1.09 [-1.39, -0.851]	2e-23	0.657 [0.646, 0.668]	0.749 [0.745, 0.759]
S. agalactiae	-0.245 [-0.451, -0.187]	0.0293	4.64 [3.98, 5.0]	4.37 [3.23, 10.4]
H. influenzae	-0.171 [-0.766, 0.014]	1.32e-11	0.697 [0.62, 0.784]	1.06 [1.03, 1.09]
C. jejuni	-1.14 [-1.33, -0.987]	1.7e-29	2.19 [2.01, 2.29]	4.07 [3.88, 4.38]
