# Supplementary material for: Core genes can have higher recombination rates than accessory genes within global microbial populations
Source: eLife. 2022 Jul 8;11:e78533. doi: 10.7554/eLife.78533 (PMC9444244; doi:10.7554/eLife.78533)
Supplement: Supplementary file 2. — Values listed in the table were computed using the pool’s mutational divergence (θpool) for core/accessory genome pairs for individual clusters and pairs of clusters. This table is identical to Supplementary file 1 except the statistics displayed here were calculated using θpool . [file elife-78533-supp2.xlsx]

## Sheet: Sheet1
Species	Effect size for	p-value
S. pneumoniae	1.79 [1.63, 1.95]	1.92e-159	0.0985 [0.0977, 0.0995]	0.0807 [0.0803, 0.0811]
P. aeruginosa	1.33 [1.12, 1.57]	9.24e-26	0.0312 [0.0279, 0.0324]	0.0268 [0.0227, 0.0284]
S. aureus	2.84 [2.54, 3.22]	3.97e-65	0.159 [0.152, 0.162]	0.0729 [0.0711, 0.0824]
S. enterica	0.924 [0.819, 1.06]	1.17e-15	0.0559 [0.0521, 0.0655]	0.0218 [0.0199, 0.0244]
E. coli	1.79 [1.49, 2.87]	2.6e-17	0.0821 [0.0799, 0.0836]	0.0654 [0.0645, 0.0661]
S. flexneri	2.42 [2.09, 3.3]	8.3e-06	0.0688 [0.0682, 0.0702]	0.0639 [0.0638, 0.0639]
H. pylori	0.379 [0.16, 0.588]	0.0976	0.0979 [0.0908, 0.119]	0.0918 [0.0863, 0.0998]
N. gonorrhoeae	-0.284 [-0.398, -0.171]	8.63e-06	0.0489 [0.048, 0.0497]	0.0547 [0.0524, 0.0568]
N. meningitidis	-0.278 [-0.468, -0.116]	3.04e-05	0.100 [0.0997, 0.102]	0.102 [0.102, 0.103]
S. agalactiae	1.91 [1.56, 2.43]	5.81e-14	0.0973 [0.0885, 0.108]	0.0234 [0.0218, 0.0257]
H. influenzae	1.01 [0.855, 1.2]	8.4e-20	0.122 [0.117, 0.128]	0.104 [0.101, 0.107]
C. jejuni	1.61 [1.47, 1.8]	3.44e-36	0.0937 [0.089, 0.0989]	0.0621 [0.0606, 0.0629]
