# Supplementary material for: Core genes can have higher recombination rates than accessory genes within global microbial populations
Source: eLife. 2022 Jul 8;11:e78533. doi: 10.7554/eLife.78533 (PMC9444244; doi:10.7554/eLife.78533)
Supplement: Supplementary file 3. — Column descriptions are as follows: ‘species’ and ‘full name’ give the abbreviated species name used in the main text and full species name, respectively, ‘major clusters’ gives the number of sequence clusters analyzed, ‘total strains aligned’ gives the number of consensus genomes (or whole genome sequences) which were made by aligning raw reads to the reference genome, ‘total strains in major clusters’ gives the number of strains included in the major clusters (and therefore included in the analysis of recombination parameters), and ‘min strains per cluster’ gives the minimum number of strains a cluster had to have to be designated as a major cluster. The minimum cluster size was lowered for smaller strain collections as follows (where s is the number of strains in the collection): for s > 10,000 in the collection the minimum cluster size was 100, for 10,000 > s > 5000 the minimum was 50 (S. enterica was on the border, so we took the minimum to be 50), for 5000 > s > 1000 the minimum was 25, and for s < 1000 the minimum was 10. The last four columns give the average synonymous diversity (ds) within clusters and between clusters (shown as mean ± st. dev.). ‘Acc’ stands for accessory. [file elife-78533-supp3.xlsx]

## Sheet: Sheet1
Species	Full name	major clusters	total strains aligned	total strains in major clusters	min strains per cluster	for core within cluster	for core between clusters	for acc within cluster	for acc between clusters
S. pneumoniae	Streptococcus pneumoniae	44	26599	24097	100
S. agalactiae	Streptococcus agalactiae	17	7917	7365	50
S. enterica	Salmonella enterica subsp. enterica	18	10357	6296	50
E. coli	Escherichia coli	15	8564	5362	50
S. flexneri	Shigella flexneri	15	2248	1556	25
S. aureus	Staphylococcus aureus	30	25125	22535	100
N. gonorrhoeae	Neisseria gonorrhoeae	25	7818	6724	50
N. meningitidis	Neisseria meningitidis	18	13017	10968	100
P. aeruginosa	Pseudomonas aeruginosa	18	873	667	10
H. pylori	Helicobacter pylori	11	401	298	10
H. influenzae	Haemophilus influenzae	10	636	555	10
C. jejuni	Campylobacter jejuni	20	15702	13793	100
