# Supplementary material for: Core genes can have higher recombination rates than accessory genes within global microbial populations
Source: eLife. 2022 Jul 8;11:e78533. doi: 10.7554/eLife.78533 (PMC9444244; doi:10.7554/eLife.78533)
Supplement: Supplementary file 4. — Two-sided p values were calculated using the Friedman test to compare the matched distributions of the normalized recombination rate (γ/μpool) and recombinational coverage (csample) for all four gene frequency bins within each microbial species shown in Figure 3—figure supplement 1. Null hypothesis in this case is that the measurements have been drawn from the same distribution. [file elife-78533-supp4.xlsx]

## Sheet: Sheet1
Species	p-value	p-value
S. pneumoniae	4.11e-97	1.76e-173
S. agalactiae	0.0323	0.00531
S. enterica	0.114	0.000415
E. coli	0.00209	5.04e-08
S. flexneri	5.79e-09	1e-08
S. aureus	0.00932	2.44e-85
N. gonorrhoeae	4.53e-08	6.57e-36
N. meningitidis	5.41e-67	2.03e-63
P. aeruginosa	0.0781	1e-07
H. influenzae	1.82e-06	2.08e-19
C. jejuni	1.51e-18	1.48e-37
